# Supplementary material for: Loss of androgen signaling in mesenchymal sonic hedgehog responsive cells diminishes prostate development, growth, and regeneration
Source: PubMed Central journal article supplement (PMC6980684; doi:10.1371/journal.pgen.1008588), 2020-01-13
Supplement: pgen.1008588.s001.pdf [file pgen.1008588.s001.pdf]

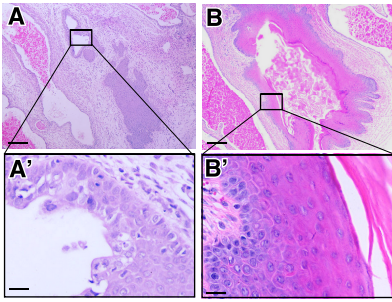

**R26<sup>mTmG/+</sup>;*Ar*<sup>L/Y</sup>;*Gli1*<sup>CreER/+</sup>**

**S1 Fig. Histopathologic analysis of postnatal prostates from mice with AR deletion in Gli1-expressing cells during embryogenesis.** Representative images of squamous metaplasia (*A*) and squamous cysts (*B*) with prominent central keratinization from prostate tissues isolated from 8-week old *R26<sup>mTmG/+</sup>;*Ar*<sup>L/Y</sup>;*Gli1*<sup>CreER/+</sup>* mice. Scale bars, A and B, 200  $\mu$ m; A' and B', 20  $\mu$ m.
