# Supplementary material for: Loss of androgen signaling in mesenchymal sonic hedgehog responsive cells diminishes prostate development, growth, and regeneration
Source: PubMed Central journal article supplement (PMC6980684; doi:10.1371/journal.pgen.1008588), 2020-01-13
Supplement: pgen.1008588.s003.pdf [file pgen.1008588.s003.pdf]

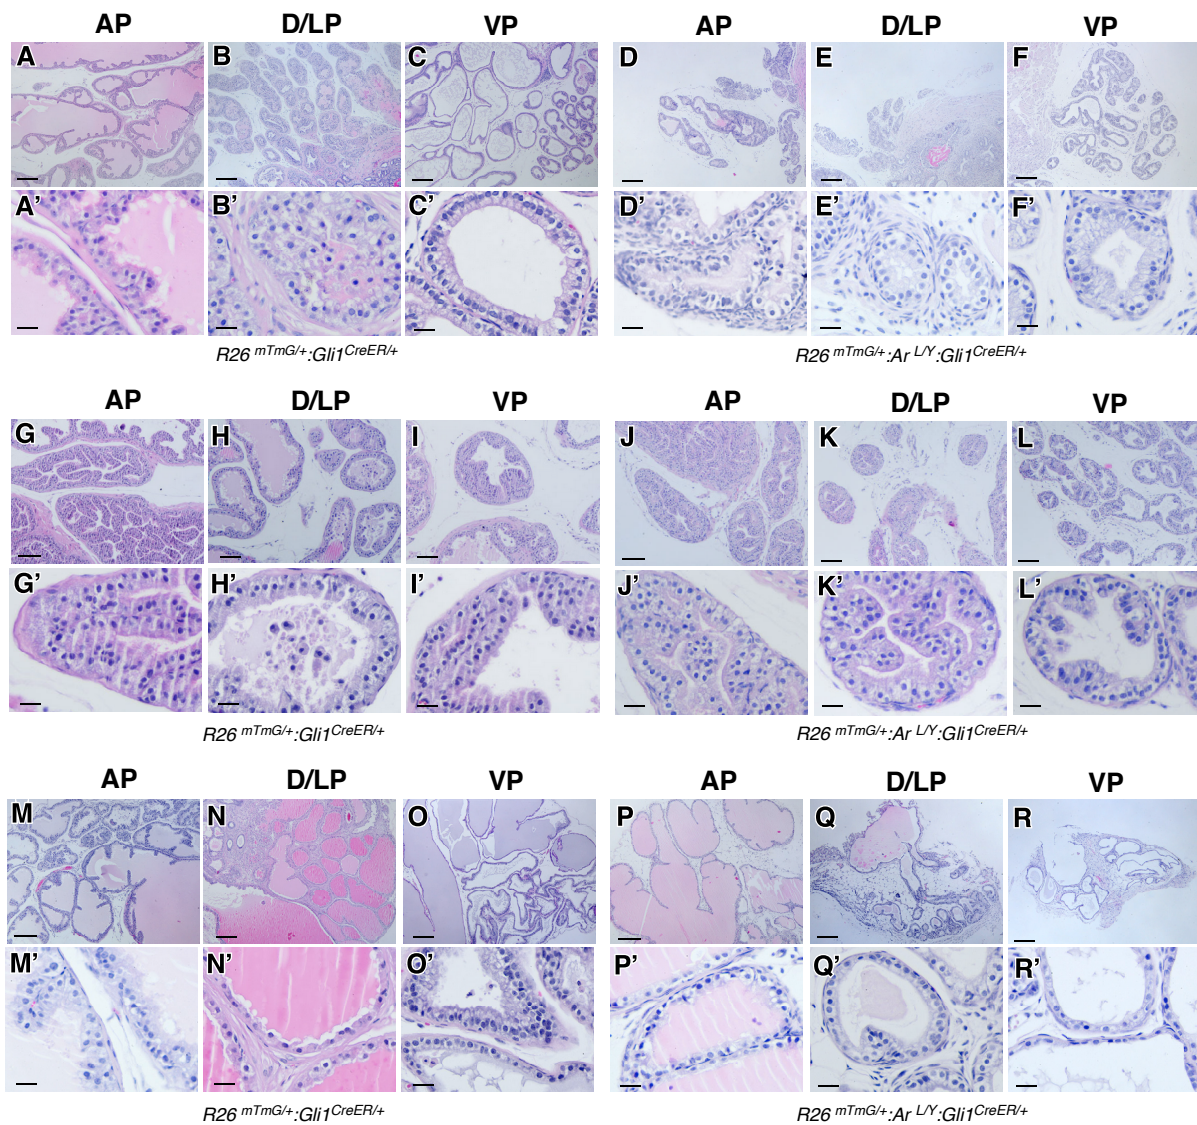

**S3 Fig. Histologic analysis of prostatic lobes from *R26<sup>mTmG/+</sup>;**Gli1<sup>CreER/+</sup>* or *R26<sup>mTmG/+</sup>;**Ar<sup>LY</sup>;**Gli1<sup>CreER/+</sup>* mice. (A-F') Representative H&E staining of prostatic lobes from P56 prostates isolated from *R26<sup>mTmG/+</sup>;**Gli1<sup>CreER/+</sup>* or *R26<sup>mTmG/+</sup>;**Ar<sup>LY</sup>;**Gli1<sup>CreER/+</sup>* mice. (G-L') Representative H&E staining of prostatic lobes from P56 prostates isolated from androgen supplemented *R26<sup>mTmG/+</sup>;**Gli1<sup>CreER/+</sup>* and *R26<sup>mTmG/+</sup>;**Ar<sup>LY</sup>;**Gli1<sup>CreER/+</sup>* mice. (M-R') Representative H&E staining of 8-week old implants from *R26<sup>mTmG/+</sup>;**Gli1<sup>CreER/+</sup>* or *R26<sup>mTmG/+</sup>;**Ar<sup>LY</sup>;**Gli1<sup>CreER/+</sup>* P14 prostatic lobes. Scale bars, A-R 100  $\mu$ m; A'-R' 20  $\mu$ m.**
