# Supplementary material for: Loss of androgen signaling in mesenchymal sonic hedgehog responsive cells diminishes prostate development, growth, and regeneration
Source: PubMed Central journal article supplement (PMC6980684; doi:10.1371/journal.pgen.1008588), 2020-01-13
Supplement: pgen.1008588.s004.pdf [file pgen.1008588.s004.pdf]

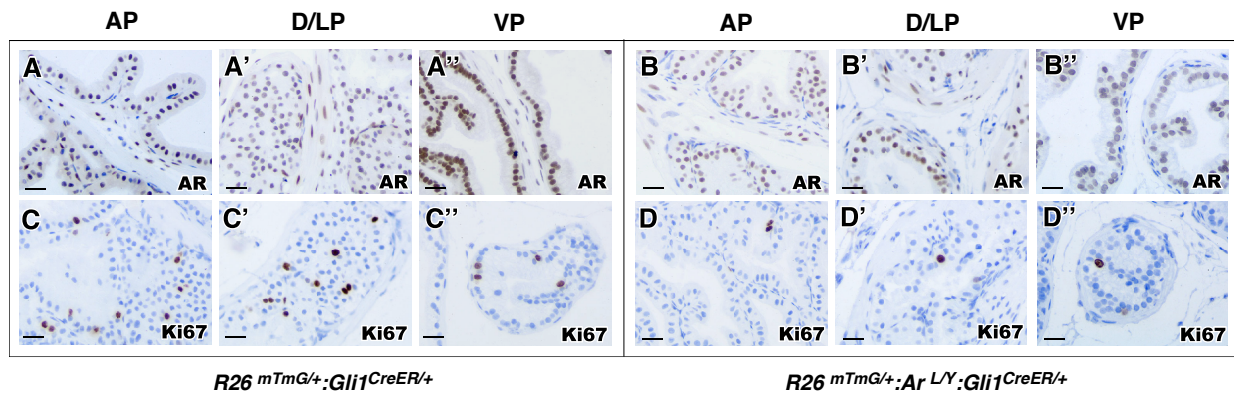

**S4 Fig. Deletion of AR in Gli1-expressing cells after castration reduces their regenerative ability in adult prostates. (A-B'')** IHC analyses for AR expression in different prostatic lobes of regenerated prostates from *R26<sup>mTmG/+</sup>;Gli1<sup>CreER/+</sup>* or *R26<sup>mTmG/+</sup>;Ar<sup>LY</sup>;Gli1<sup>CreER/+</sup>* mice. **(C-D'')** IHC analyses for Ki67 expression in different prostatic lobes of regenerated prostate tissues from *R26<sup>mTmG/+</sup>;Gli1<sup>CreER/+</sup>* or *R26<sup>mTmG/+</sup>;Ar<sup>LY</sup>;Gli1<sup>CreER/+</sup>* mice. Scale bars, 20  $\mu$ m.
