# Supplementary material for: Loss of androgen signaling in mesenchymal sonic hedgehog responsive cells diminishes prostate development, growth, and regeneration
Source: PubMed Central journal article supplement (PMC6980684; doi:10.1371/journal.pgen.1008588), 2020-01-13
Supplement: pgen.1008588.s006.pdf [file pgen.1008588.s006.pdf]

**Table S1. Quantification of AR and mGFP double positive cells per GFP positive cells of E18.5 UGS tissues.**

| Supporting data for Figure 1M |                                                     |                   |                   |                                                                      |                   |                   |
|-------------------------------|-----------------------------------------------------|-------------------|-------------------|----------------------------------------------------------------------|-------------------|-------------------|
|                               | <b>R26<sup>mTmGL/+</sup>:Gli1<sup>CreER/+</sup></b> |                   |                   | <b>R26<sup>mTmGL/+</sup>:Ar<sup>L/Y</sup>:Gli1<sup>CreER/+</sup></b> |                   |                   |
|                               | <b>GFP+AR+</b>                                      | <b>Total GFP+</b> | <b>Percentage</b> | <b>GFP+AR+</b>                                                       | <b>Total GFP+</b> | <b>Percentage</b> |
| <b>#1</b>                     | 141                                                 | 143               | 98.6              | 25                                                                   | 138               | 18.1              |
| <b>#2</b>                     | 56                                                  | 58                | 96.6              | 44                                                                   | 249               | 17.7              |
| <b>#3</b>                     | 80                                                  | 85                | 94.1              | 52                                                                   | 215               | 24.2              |
| <b>#4</b>                     | 64                                                  | 68                | 94.1              | 99                                                                   | 170               | 58.2              |
| <b>#5</b>                     | 97                                                  | 102               | 95.1              | 71                                                                   | 163               | 43.6              |
| <b>#6</b>                     | 48                                                  | 49                | 98.0              | 46                                                                   | 234               | 19.7              |
| <b>#7</b>                     | 88                                                  | 92                | 95.7              | 25                                                                   | 202               | 12.4              |
| <b>#8</b>                     | 64                                                  | 68                | 94.1              | 49                                                                   | 116               | 42.2              |
| <b>#9</b>                     | 31                                                  | 32                | 96.9              | 41                                                                   | 185               | 22.2              |
| <b>#10</b>                    | 77                                                  | 85                | 90.6              |                                                                      |                   |                   |
| <b>#11</b>                    | 82                                                  | 86                | 95.3              |                                                                      |                   |                   |
| <b>#12</b>                    | 69                                                  | 76                | 90.8              |                                                                      |                   |                   |
|                               |                                                     | <b>Mean</b>       | <b>95.0</b>       |                                                                      | <b>Mean</b>       | <b>27.0</b>       |
|                               |                                                     | <b>S.D.</b>       | <b>2.4</b>        |                                                                      | <b>S.D.</b>       | <b>14.6</b>       |
