# Supplementary material for: Loss of androgen signaling in mesenchymal sonic hedgehog responsive cells diminishes prostate development, growth, and regeneration
Source: PubMed Central journal article supplement (PMC6980684; doi:10.1371/journal.pgen.1008588), 2020-01-13
Supplement: pgen.1008588.s007.pdf [file pgen.1008588.s007.pdf]

**Table S2. Quantification of AR and mGFP double positive cells per GFP positive cells of P56 prostate tissues.**

| Supporting data for Figure 4N right panel |                                                    |                   |                   |                                                                     |                   |                   |
|-------------------------------------------|----------------------------------------------------|-------------------|-------------------|---------------------------------------------------------------------|-------------------|-------------------|
|                                           | <b>R26<sup>mTmG/+</sup>:Gli1<sup>CreER/+</sup></b> |                   |                   | <b>R26<sup>mTmG/+</sup>:Ar<sup>L/Y</sup>:Gli1<sup>CreER/+</sup></b> |                   |                   |
|                                           | <b>GFP+AR+</b>                                     | <b>Total GFP+</b> | <b>Percentage</b> | <b>GFP+AR+</b>                                                      | <b>Total GFP+</b> | <b>Percentage</b> |
| #1                                        | 21                                                 | 48                | 43.8              | 3                                                                   | 60                | 5.0               |
| #2                                        | 57                                                 | 95                | 60.0              | 7                                                                   | 105               | 6.7               |
| #3                                        | 33                                                 | 56                | 58.9              | 3                                                                   | 127               | 2.4               |
| #4                                        | 30                                                 | 55                | 54.5              | 2                                                                   | 63                | 3.2               |
| #5                                        | 39                                                 | 67                | 58.2              | 3                                                                   | 70                | 4.3               |
| #6                                        | 42                                                 | 84                | 50.0              | 2                                                                   | 68                | 2.9               |
| #7                                        | 32                                                 | 56                | 57.1              | 0                                                                   | 70                | 0.0               |
| #8                                        | 84                                                 | 156               | 53.8              | 5                                                                   | 99                | 5.1               |
| #9                                        | 46                                                 | 104               | 44.2              | 2                                                                   | 53                | 3.8               |
| #10                                       | 44                                                 | 83                | 53.0              | 2                                                                   | 74                | 2.7               |
| #11                                       | 76                                                 | 138               | 55.1              | 3                                                                   | 77                | 3.9               |
| #12                                       | 51                                                 | 87                | 58.6              | 5                                                                   | 70                | 7.1               |
| #13                                       | 23                                                 | 44                | 52.3              | 3                                                                   | 56                | 5.4               |
| #14                                       | 26                                                 | 54                | 48.1              |                                                                     |                   |                   |
|                                           |                                                    | <b>Mean</b>       | <b>53.6</b>       |                                                                     | <b>Mean</b>       | <b>4.0</b>        |
|                                           |                                                    | <b>S.D.</b>       | <b>5.1</b>        |                                                                     | <b>S.D.</b>       | <b>1.8</b>        |
