# Supplementary material for: Loss of androgen signaling in mesenchymal sonic hedgehog responsive cells diminishes prostate development, growth, and regeneration
Source: PubMed Central journal article supplement (PMC6980684; doi:10.1371/journal.pgen.1008588), 2020-01-13
Supplement: pgen.1008588.s008.pdf [file pgen.1008588.s008.pdf]

**Table S3. Quantification of AR and mGFP double positive cells per GFP positive cells of different regenerated prostatic lobes.**

| Supporting data for figure 6M |                                                 |             |             |                                                                    |             |             |
|-------------------------------|-------------------------------------------------|-------------|-------------|--------------------------------------------------------------------|-------------|-------------|
|                               | R26 <sup>mTmGL/+</sup> :Gli1 <sup>CreER/+</sup> |             |             | R26 <sup>mTmGL/+</sup> :Ar <sup>L/Y</sup> :Gli1 <sup>CreER/+</sup> |             |             |
| AP                            | GFP+AR+                                         | Total GFP+  | Percentage  | GFP+AR+                                                            | Total GFP+  | Percentage  |
| #1                            | 5                                               | 41          | 12.2        | 9                                                                  | 39          | 23.1        |
| #2                            | 27                                              | 60          | 45.0        | 14                                                                 | 61          | 23.0        |
| #3                            | 14                                              | 45          | 31.1        | 17                                                                 | 42          | 40.5        |
| #4                            | 25                                              | 54          | 46.3        | 10                                                                 | 46          | 21.7        |
| #5                            | 19                                              | 44          | 43.2        | 3                                                                  | 24          | 12.5        |
| #6                            | 38                                              | 68          | 55.9        | 8                                                                  | 34          | 23.5        |
| #7                            | 24                                              | 59          | 40.7        | 5                                                                  | 34          | 14.7        |
| #8                            | 11                                              | 55          | 20.0        | 10                                                                 | 38          | 26.3        |
|                               |                                                 | <b>Mean</b> | <b>38.3</b> |                                                                    | <b>Mean</b> | <b>23.9</b> |
|                               |                                                 | <b>S.D.</b> | <b>13.7</b> |                                                                    | <b>S.D.</b> | <b>7.9</b>  |

|     | R26 <sup>mTmGL/+</sup> :Gli1 <sup>CreER/+</sup> |             |             | R26 <sup>mTmGL/+</sup> :Ar <sup>L/Y</sup> :Gli1 <sup>CreER/+</sup> |             |             |
|-----|-------------------------------------------------|-------------|-------------|--------------------------------------------------------------------|-------------|-------------|
| DLP | GFP+AR+                                         | Total GFP+  | Percentage  | GFP+AR+                                                            | Total GFP+  | Percentage  |
| #1  | 41                                              | 92          | 44.6        | 35                                                                 | 155         | 22.6        |
| #2  | 58                                              | 134         | 43.3        | 9                                                                  | 61          | 14.8        |
| #3  | 27                                              | 78          | 34.6        | 14                                                                 | 75          | 18.7        |
| #4  | 11                                              | 61          | 18.0        | 1                                                                  | 61          | 1.6         |
| #5  | 19                                              | 53          | 35.8        | 14                                                                 | 55          | 25.5        |
| #6  | 29                                              | 51          | 56.9        | 15                                                                 | 65          | 23.1        |
| #7  | 22                                              | 42          | 52.4        | 1                                                                  | 49          | 2.0         |
| #8  | 32                                              | 71          | 45.1        | 4                                                                  | 27          | 14.8        |
|     |                                                 | <b>Mean</b> | <b>41.1</b> |                                                                    | <b>Mean</b> | <b>17.0</b> |
|     |                                                 | <b>S.D.</b> | <b>11.2</b> |                                                                    | <b>S.D.</b> | <b>8.6</b>  |

|    | R26 <sup>mTmGL/+</sup> :Gli1 <sup>CreER/+</sup> |             |             | R26 <sup>mTmGL/+</sup> :Ar <sup>L/Y</sup> :Gli1 <sup>CreER/+</sup> |             |            |
|----|-------------------------------------------------|-------------|-------------|--------------------------------------------------------------------|-------------|------------|
| VP | GFP+AR+                                         | Total GFP+  | Percentage  | GFP+AR+                                                            | Total GFP+  | Percentage |
| #1 | 17                                              | 61          | 27.9        | 5                                                                  | 52          | 9.6        |
| #2 | 16                                              | 30          | 53.3        | 4                                                                  | 51          | 7.8        |
| #3 | 23                                              | 51          | 45.1        | 6                                                                  | 33          | 18.2       |
| #4 | 31                                              | 77          | 40.3        | 3                                                                  | 44          | 6.8        |
| #5 | 19                                              | 44          | 43.2        | 0                                                                  | 23          | 0.0        |
| #6 | 15                                              | 39          | 38.5        | 4                                                                  | 46          | 8.6        |
| #7 | 29                                              | 66          | 43.9        | 6                                                                  | 50          | 12         |
| #8 | 15                                              | 53          | 28.3        | 2                                                                  | 38          | 5.3        |
|    |                                                 | <b>Mean</b> | <b>39.2</b> |                                                                    | <b>Mean</b> | <b>8.6</b> |
|    |                                                 | <b>S.D.</b> | <b>8.0</b>  |                                                                    | <b>S.D.</b> | <b>5.3</b> |
