# Supplementary material for: Loss of androgen signaling in mesenchymal sonic hedgehog responsive cells diminishes prostate development, growth, and regeneration
Source: PubMed Central journal article supplement (PMC6980684; doi:10.1371/journal.pgen.1008588), 2020-01-13
Supplement: pgen.1008588.s009.pdf [file pgen.1008588.s009.pdf]

**Table S4. Quantification of Ki67 and E-cadherin double positive cells per E-cadherin positive cells of different regenerated prostatic lobes.**

| Supporting data for figure 6N |                                                     |                    |                   |                                                                      |                    |                   |
|-------------------------------|-----------------------------------------------------|--------------------|-------------------|----------------------------------------------------------------------|--------------------|-------------------|
|                               | <b>R26<sup>mTmGL/+</sup>:Gli1<sup>CreER/+</sup></b> |                    |                   | <b>R26<sup>mTmGL/+</sup>:Ar<sup>L/Y</sup>:Gli1<sup>CreER/+</sup></b> |                    |                   |
| <b>AP</b>                     | <b>Ecad+Ki67+</b>                                   | <b>Total Ecad+</b> | <b>Percentage</b> | <b>Ecad+Ki67+</b>                                                    | <b>Total Ecad+</b> | <b>Percentage</b> |
| #1                            | 16                                                  | 561                | 2.9               | 3                                                                    | 166                | 1.8               |
| #2                            | 7                                                   | 508                | 1.4               | 0                                                                    | 203                | 0.0               |
| #3                            | 14                                                  | 189                | 7.4               | 1                                                                    | 209                | 0.5               |
| #4                            | 10                                                  | 245                | 4.1               | 2                                                                    | 278                | 0.7               |
| #5                            | 9                                                   | 417                | 2.2               | 3                                                                    | 369                | 0.8               |
|                               |                                                     | <b>Mean</b>        | <b>2.9</b>        |                                                                      | <b>Mean</b>        | <b>0.8</b>        |
|                               |                                                     | <b>S.D.</b>        | <b>2.1</b>        |                                                                      | <b>S.D.</b>        | <b>0.7</b>        |

|            | <b>R26<sup>mTmGL/+</sup>:Gli1<sup>CreER/+</sup></b> |                    |                   | <b>R26<sup>mTmGL/+</sup>:Ar<sup>L/Y</sup>:Gli1<sup>CreER/+</sup></b> |                    |                   |
|------------|-----------------------------------------------------|--------------------|-------------------|----------------------------------------------------------------------|--------------------|-------------------|
| <b>DLP</b> | <b>Ecad+Ki67+</b>                                   | <b>Total Ecad+</b> | <b>Percentage</b> | <b>Ecad+Ki67+</b>                                                    | <b>Total Ecad+</b> | <b>Percentage</b> |
| #1         | 4                                                   | 104                | 3.8               | 1                                                                    | 144                | 0.7               |
| #2         | 9                                                   | 241                | 3.7               | 2                                                                    | 210                | 1.0               |
| #3         | 14                                                  | 358                | 3.9               | 0                                                                    | 119                | 0.0               |
| #4         | 18                                                  | 403                | 4.5               | 1                                                                    | 400                | 0.3               |
| #5         | 16                                                  | 470                | 3.4               | 3                                                                    | 398                | 0.6               |
|            |                                                     | <b>Mean</b>        | <b>3.9</b>        |                                                                      | <b>Mean</b>        | <b>0.5</b>        |
|            |                                                     | <b>S.D.</b>        | <b>0.3</b>        |                                                                      | <b>S.D.</b>        | <b>0.4</b>        |

|           | <b>R26<sup>mTmGL/+</sup>:Gli1<sup>CreER/+</sup></b> |                    |                   | <b>R26<sup>mTmGL/+</sup>:Ar<sup>L/Y</sup>:Gli1<sup>CreER/+</sup></b> |                    |                   |
|-----------|-----------------------------------------------------|--------------------|-------------------|----------------------------------------------------------------------|--------------------|-------------------|
| <b>VP</b> | <b>Ecad+Ki67+</b>                                   | <b>Total Ecad+</b> | <b>Percentage</b> | <b>Ecad+Ki67+</b>                                                    | <b>Total Ecad+</b> | <b>Percentage</b> |
| #1        | 16                                                  | 293                | 5.5               | 2                                                                    | 183                | 1.1               |
| #2        | 4                                                   | 349                | 1.1               | 1                                                                    | 186                | 0.5               |
| #3        | 7                                                   | 111                | 6.3               | 3                                                                    | 354                | 0.9               |
| #4        | 9                                                   | 320                | 2.8               | 2                                                                    | 312                | 0.6               |
| #5        | 8                                                   | 201                | 4.0               | 1                                                                    | 238                | 0.4               |
|           |                                                     | <b>Mean</b>        | <b>3.5</b>        |                                                                      | <b>Mean</b>        | <b>0.7</b>        |
|           |                                                     | <b>S.D.</b>        | <b>1.8</b>        |                                                                      | <b>S.D.</b>        | <b>0.3</b>        |
