# Supplementary material for: Loss of androgen signaling in mesenchymal sonic hedgehog responsive cells diminishes prostate development, growth, and regeneration
Source: PubMed Central journal article supplement (PMC6980684; doi:10.1371/journal.pgen.1008588), 2020-01-13
Supplement: pgen.1008588.s010.pdf [file pgen.1008588.s010.pdf]

**Table S5. Up-regulated and down-regulated gene list from Gli1-expressing cells from  $R26^{mTmG/+};Ar^{LY};Gli1^{CreER/+}$  and  $R26^{mTmG/+};Gli1^{CreER/+}$  mice.** List of up-regulated and down-regulated genes from AR-deficient Gli1-expressing cells from  $R26^{mTmG/+};Ar^{LY};Gli1^{CreER/+}$  mice compared to normal Gli1-expressing cells from age- and sex-matched  $R26^{mTmG/+};Gli1^{CreER/+}$  controls. Supporting data for Figure 7C.

| Symbol    | logFC    | PValue   | FDR      |
|-----------|----------|----------|----------|
| Mrgprg    | -6.94372 | 4.44E-14 | 2.35E-11 |
| Gbp1      | -6.06028 | 1.31E-08 | 2.79E-06 |
| Impg1     | -5.85428 | 1.01E-07 | 1.86E-05 |
| Pdcd1     | -5.61733 | 8.43E-07 | 0.000115 |
| Tmed6     | -5.35973 | 1.34E-05 | 0.001187 |
| Lyz1      | -5.20423 | 3.08E-25 | 5.01E-22 |
| Dsg4      | -5.19518 | 4.2E-05  | 0.003236 |
| Fpr2      | -5.18795 | 4.2E-05  | 0.003236 |
| Ugt2b1    | -4.85231 | 0.000244 | 0.013311 |
| Fer1l4    | -4.84369 | 0.000244 | 0.013311 |
| Nsun4     | -4.83052 | 0.000444 | 0.021161 |
| Ceacam2   | -4.82529 | 0.000444 | 0.021161 |
| Cyp2ab1   | -4.8192  | 0.000444 | 0.021161 |
| Tsix      | -4.75041 | 1.07E-08 | 2.35E-06 |
| Tmprss11f | -4.69864 | 0.000812 | 0.034001 |
| Cla3      | -4.49111 | 6.79E-13 | 3.12E-10 |
| Slco4c1   | -4.48317 | 0.001498 | 0.053181 |
| Pedh15    | -4.44923 | 3.48E-10 | 9.41E-08 |
| Muc20     | -4.37178 | 1.18E-21 | 1.31E-18 |
| Cd209d    | -4.35875 | 1.04E-12 | 4.68E-10 |
| Ces1e     | -4.11161 | 3.33E-10 | 9.13E-08 |
| Slc10a5   | -4.04895 | 8.5E-08  | 1.6E-05  |
| Ccl22     | -3.87422 | 1.48E-14 | 8.24E-12 |
| Cd209b    | -3.77348 | 4.38E-19 | 3.96E-16 |
| Slc25a18  | -3.75668 | 0.000123 | 0.007862 |
| Clec2i    | -3.75591 | 1.99E-06 | 0.000243 |
| Klk1b22   | -3.71922 | 2.71E-13 | 1.36E-10 |
| Ii5       | -3.6791  | 0.000208 | 0.012013 |
| Retnla    | -3.67847 | 2.82E-34 | 9.93E-31 |
| Fmo3      | -3.62323 | 4.5E-19  | 3.96E-16 |
| Agr2      | -3.55283 | 1.14E-19 | 1.09E-16 |
| Atoh1     | -3.51985 | 8.64E-10 | 2.15E-07 |
| Cyp2b10   | -3.51421 | 8.64E-10 | 2.15E-07 |
| Sox2ot    | -3.50295 | 0.001032 | 0.040011 |
| Nkx2-1    | -3.42914 | 0.001032 | 0.040011 |

|          |          |          |          |
|----------|----------|----------|----------|
| Fcna     | -3.42295 | 1.23E-27 | 2.17E-24 |
| Lgals12  | -3.41357 | 0.001032 | 0.040011 |
| Rnf183   | -3.40456 | 0.001032 | 0.040011 |
| Dkk11    | -3.40141 | 4.87E-19 | 4.12E-16 |
| Cd200r2  | -3.39204 | 5.33E-05 | 0.003914 |
| Lhx5     | -3.36123 | 3.47E-08 | 6.93E-06 |
| Folr1    | -3.32528 | 3.21E-20 | 3.39E-17 |
| Pbsn     | -3.2369  | 0.00014  | 0.008773 |
| Oca2     | -3.23346 | 0.000226 | 0.012683 |
| Lrrc31   | -3.2025  | 1.4E-09  | 3.4E-07  |
| C6       | -3.18096 | 2.06E-12 | 8.73E-10 |
| Ccl6     | -3.14635 | 4.11E-25 | 6.21E-22 |
| Olfm4    | -3.12451 | 7.01E-24 | 9.26E-21 |
| Csmd3    | -3.00171 | 3.25E-06 | 0.000379 |
| Ccl8     | -2.98696 | 4.92E-24 | 6.92E-21 |
| Trim67   | -2.95176 | 0.000976 | 0.038757 |
| Slc5a8   | -2.8842  | 2.12E-12 | 8.79E-10 |
| Tspan32  | -2.88148 | 1.04E-05 | 0.000977 |
| Cxcl17   | -2.87343 | 1.17E-14 | 6.67E-12 |
| Gria2    | -2.79498 | 0.000126 | 0.008055 |
| Scn4b    | -2.77208 | 3.6E-05  | 0.002827 |
| Nat8l    | -2.76775 | 2.29E-05 | 0.00192  |
| Slc26a9  | -2.75685 | 3.4E-05  | 0.002701 |
| Ugt8a    | -2.74798 | 0.000834 | 0.034479 |
| Entpd8   | -2.73648 | 3.92E-11 | 1.31E-08 |
| Ifitm6   | -2.70765 | 0.000192 | 0.011413 |
| Tmprss4  | -2.70429 | 0.000192 | 0.011413 |
| Pglyrp1  | -2.69502 | 5.09E-12 | 1.99E-09 |
| Ccdc89   | -2.68886 | 0.001311 | 0.048424 |
| Cd300ld  | -2.64965 | 6.65E-14 | 3.43E-11 |
| Pydc4    | -2.64836 | 3.35E-06 | 0.000382 |
| Tnfrsf14 | -2.62166 | 3.59E-05 | 0.002827 |
| Oit1     | -2.61983 | 2.04E-17 | 1.54E-14 |
| Spink5   | -2.56461 | 3.35E-06 | 0.000382 |
| Eci3     | -2.52742 | 4.64E-07 | 7.01E-05 |
| Wfdc15b  | -2.47791 | 5.37E-10 | 1.4E-07  |
| Ctcf1    | -2.46487 | 4.59E-06 | 0.000484 |
| Ms4a8a   | -2.42837 | 1.61E-05 | 0.001398 |
| Pla2g4e  | -2.4274  | 0.000549 | 0.025177 |
| Dhrs9    | -2.41424 | 6.46E-12 | 2.42E-09 |
| Pzca     | -2.40773 | 5.68E-13 | 2.73E-10 |
| Amd2     | -2.4069  | 0.000549 | 0.025177 |
| Ccl9     | -2.35383 | 3.05E-14 | 1.65E-11 |

|          |          |          |          |
|----------|----------|----------|----------|
| Car2     | -2.33696 | 1.99E-16 | 1.4E-13  |
| Hal      | -2.29917 | 3.41E-09 | 8.01E-07 |
| Tlr8     | -2.2886  | 3.97E-08 | 7.83E-06 |
| Tmem8    | -2.2877  | 1.07E-10 | 3.2E-08  |
| Oas1g    | -2.26196 | 1.61E-05 | 0.001398 |
| Oas1c    | -2.25077 | 1.76E-06 | 0.000223 |
| Lrrc26   | -2.23969 | 1.08E-12 | 4.75E-10 |
| Galnt9   | -2.23199 | 5.02E-05 | 0.003722 |
| Rit2     | -2.20082 | 4.03E-07 | 6.39E-05 |
| Ugt1a1   | -2.18176 | 2.15E-06 | 0.000259 |
| Lrrtm4   | -2.17837 | 7.08E-05 | 0.004955 |
| Cxcr3    | -2.16713 | 6.03E-05 | 0.004318 |
| Cd200r1  | -2.14573 | 6.94E-06 | 0.000689 |
| Ugt2b34  | -2.13384 | 6.53E-12 | 2.42E-09 |
| Folr2    | -2.10596 | 5.11E-13 | 2.51E-10 |
| Mpz      | -1.91599 | 1.4E-05  | 0.001231 |
| Lyve1    | -1.89686 | 1.8E-10  | 5.21E-08 |
| Tlr1     | -1.85351 | 3.09E-07 | 5.03E-05 |
| Ckm      | -1.85038 | 0.000238 | 0.013179 |
| Cd69     | -1.84556 | 0.00111  | 0.042498 |
| Rsad2    | -1.7956  | 4.33E-10 | 1.16E-07 |
| Syt4     | -1.75835 | 1.16E-06 | 0.000153 |
| Ar       | -1.75036 | 2.35E-10 | 6.53E-08 |
| Lst1     | -1.65266 | 0.001004 | 0.039488 |
| Alox5ap  | -1.6442  | 7.33E-07 | 0.000103 |
| Cd84     | -1.64392 | 1.48E-06 | 0.000191 |
| Rorc     | -1.59355 | 3.02E-05 | 0.002456 |
| Dok2     | -1.57665 | 1E-06    | 0.000133 |
| H2-DMb2  | -1.57623 | 0.000131 | 0.008313 |
| Slc5a1   | -1.54665 | 0.000429 | 0.021103 |
| Alox5    | -1.54124 | 5.05E-06 | 0.000516 |
| Cd4      | -1.51387 | 8.37E-06 | 0.000807 |
| Srp54a   | -1.51233 | 0.000346 | 0.017696 |
| Fcer1g   | -1.50873 | 1.1E-07  | 2.01E-05 |
| Myo5c    | -1.48147 | 3.09E-05 | 0.002491 |
| Ap1m2    | -1.45932 | 1.09E-05 | 0.001002 |
| Siglece  | -1.45139 | 5.6E-05  | 0.004081 |
| Dnahc7b  | 1.458218 | 0.000663 | 0.029017 |
| Slc22a1  | 1.46127  | 0.000222 | 0.012598 |
| Neb1     | 1.483424 | 2.38E-06 | 0.000282 |
| Eps811   | 1.491165 | 2.18E-06 | 0.00026  |
| Atp6v0d2 | 1.501546 | 0.000435 | 0.021161 |
| Gm9008   | 1.514597 | 0.000821 | 0.034078 |

|               |          |          |          |
|---------------|----------|----------|----------|
| Otop1         | 1.515448 | 0.001034 | 0.040013 |
| Lif           | 1.518707 | 4.52E-08 | 8.76E-06 |
| Nos3          | 1.521591 | 0.000816 | 0.034001 |
| Pif1          | 1.533107 | 0.000296 | 0.015532 |
| Rnaset2b      | 1.539037 | 0.000122 | 0.007862 |
| Rasgef1a      | 1.542688 | 0.000435 | 0.021161 |
| Igsf9b        | 1.547291 | 6.25E-05 | 0.004447 |
| Slc5a7        | 1.554231 | 0.000661 | 0.028986 |
| Nav3          | 1.565037 | 8.62E-08 | 1.61E-05 |
| Gm13251       | 1.574247 | 0.000256 | 0.013778 |
| Tmem144       | 1.576141 | 2.27E-07 | 3.87E-05 |
| Gm11722       | 1.577421 | 6.73E-05 | 0.004723 |
| Slc39a4       | 1.583095 | 3.56E-06 | 0.000396 |
| Kank4         | 1.587279 | 3.42E-07 | 5.52E-05 |
| Rin1          | 1.600372 | 4.05E-07 | 6.39E-05 |
| Mmp10         | 1.602304 | 4.2E-07  | 6.52E-05 |
| Aicda         | 1.603042 | 0.000816 | 0.034001 |
| Xkr4          | 1.616554 | 5.24E-05 | 0.003861 |
| Klk1          | 1.627055 | 4.1E-07  | 6.42E-05 |
| Cdh23         | 1.630752 | 0.000643 | 0.028438 |
| Rgs20         | 1.631421 | 0.001319 | 0.048469 |
| Il2rb         | 1.646975 | 6.38E-05 | 0.004494 |
| Sst           | 1.647198 | 0.000507 | 0.02365  |
| Nos1          | 1.649362 | 0.000742 | 0.031878 |
| Tmem169       | 1.654751 | 0.000612 | 0.027199 |
| Cenpe         | 1.661998 | 9.15E-07 | 0.000123 |
| Ivl           | 1.670578 | 3.34E-05 | 0.002674 |
| Gm13219       | 1.684811 | 2.35E-05 | 0.001958 |
| Tm4sf4        | 1.686795 | 3.94E-06 | 0.000426 |
| Gm17414       | 1.694018 | 0.000293 | 0.015483 |
| A530054K11Rik | 1.700378 | 8.32E-07 | 0.000114 |
| Tns4          | 1.709034 | 1.38E-07 | 2.47E-05 |
| Lefty1        | 1.710308 | 0.000486 | 0.022712 |
| Tuba8         | 1.721447 | 6.57E-06 | 0.000658 |
| Ttyh2         | 1.747712 | 4.96E-10 | 1.31E-07 |
| Epm2a         | 1.75874  | 7.49E-08 | 1.43E-05 |
| Gsg2          | 1.769154 | 0.000217 | 0.012346 |
| Dgkk          | 1.779561 | 0.00126  | 0.047138 |
| RP24-201C14.6 | 1.800582 | 0.000205 | 0.011956 |
| Rnase1        | 1.82974  | 1.39E-09 | 3.4E-07  |
| Stag3         | 1.8412   | 1.92E-06 | 0.000237 |
| Gldn          | 1.844976 | 1.5E-06  | 0.000192 |
| Otud7a        | 1.849187 | 0.00111  | 0.042498 |

|               |          |          |          |
|---------------|----------|----------|----------|
| D130062J21Rik | 1.879199 | 0.000608 | 0.02711  |
| Spred3        | 1.895203 | 3.38E-05 | 0.002696 |
| Igsf21        | 1.925181 | 1.4E-07  | 2.48E-05 |
| Tmprss11a     | 1.943336 | 1.33E-08 | 2.8E-06  |
| Ace2          | 1.949425 | 0.000373 | 0.018734 |
| Hmgn2         | 2.036678 | 4.97E-12 | 1.98E-09 |
| Olf1033       | 2.039568 | 4.61E-06 | 0.000484 |
| Abca4         | 2.072143 | 1.03E-05 | 0.000963 |
| Sez6l         | 2.16921  | 7.47E-07 | 0.000104 |
| Sycp1         | 2.174962 | 2.23E-10 | 6.28E-08 |
| Epgn          | 2.245969 | 3.67E-06 | 0.000402 |
| Prr9          | 2.309296 | 1.17E-14 | 6.67E-12 |
| Sva           | 2.411262 | 5.44E-11 | 1.8E-08  |
| Dsc1          | 2.412794 | 0.001218 | 0.046057 |
| Sorcs1        | 2.514318 | 4.05E-05 | 0.003144 |
| Olf1550       | 2.520046 | 0.000192 | 0.011413 |
| Chga          | 2.610128 | 0.000531 | 0.024532 |
| Fbp1          | 2.625462 | 1.71E-08 | 3.58E-06 |
| Slpi          | 2.647711 | 0.000248 | 0.013479 |
| Vip           | 2.698287 | 4.76E-06 | 0.000496 |
| Ankrd45       | 2.711927 | 0.000683 | 0.029753 |
| Pgbd1         | 2.775884 | 0.000447 | 0.021199 |
| Kcnj2         | 2.939146 | 4.52E-06 | 0.00048  |
| Bpifc         | 3.035769 | 0.000226 | 0.012683 |
| Krt33a        | 3.063704 | 1.33E-06 | 0.000174 |
| Il12b         | 3.07973  | 1.23E-15 | 7.65E-13 |
| A930017K11Rik | 3.341201 | 0.000603 | 0.027011 |
| Marco         | 3.41895  | 1.74E-08 | 3.61E-06 |
| AV064505      | 3.424061 | 0.000354 | 0.01797  |
| Gm8113        | 3.48746  | 1.33E-07 | 2.4E-05  |
| Gpr110        | 3.552125 | 0.000208 | 0.012013 |
| Slc17a8       | 3.601123 | 1.26E-06 | 0.000165 |
| Cnga2         | 3.618358 | 0.000123 | 0.007862 |
| Slc14a1       | 3.674538 | 2.56E-30 | 5.41E-27 |
| Btla          | 3.77214  | 4.32E-05 | 0.003302 |
| Chi3l3        | 3.795815 | 2.06E-07 | 3.61E-05 |
| A530099J19Rik | 3.958872 | 9.25E-06 | 0.00088  |
| Slc30a3       | 3.961321 | 9.25E-06 | 0.00088  |
| Svs5          | 3.964478 | 1.47E-32 | 3.89E-29 |
| Hba-a1        | 4.042177 | 7.34E-11 | 2.29E-08 |
| Krt34         | 4.453912 | 0.001498 | 0.053181 |
| Alox12e       | 4.516058 | 9.97E-12 | 3.63E-09 |
| Hbb-b2        | 4.570024 | 0.001498 | 0.053181 |

|          |          |          |          |
|----------|----------|----------|----------|
| Hba-a2   | 4.572032 | 0.000812 | 0.034001 |
| Dsg3     | 4.575689 | 0.000812 | 0.034001 |
| Zfp804b  | 4.764199 | 0.000444 | 0.021161 |
| Ccnb1ip1 | 4.777473 | 0.000444 | 0.021161 |
| Gnrh1    | 4.778367 | 0.000444 | 0.021161 |
| Spr2f    | 4.957186 | 8.32E-11 | 2.55E-08 |
| Caln1    | 5.280418 | 1.34E-05 | 0.001187 |
| Spr2g    | 5.285713 | 1.34E-05 | 0.001187 |
| Gpr82    | 5.427216 | 4.35E-06 | 0.000469 |
| Mmp7     | 7.142512 | 6.1E-16  | 4.03E-13 |
| Hbb-b1   | 7.403376 | 5.59E-18 | 4.37E-15 |

---
