# Supplementary material for: Loss of androgen signaling in mesenchymal sonic hedgehog responsive cells diminishes prostate development, growth, and regeneration
Source: PubMed Central journal article supplement (PMC6980684; doi:10.1371/journal.pgen.1008588), 2020-01-13
Supplement: pgen.1008588.s011.pdf [file pgen.1008588.s011.pdf]

**Table S6. Antibodies used for IHC and IF experiments in this study.**

| <b>Antibody</b>          | <b>Vendors and Cat #</b>             | <b>Species</b> | <b>Working dilution</b> |
|--------------------------|--------------------------------------|----------------|-------------------------|
| GFP                      | Cell Signaling #2956                 | rabbit IgG     | 1:200                   |
| GFP                      | Cell Signaling #2955                 | mouse IgG      | 1:200                   |
| GFP                      | Abcam #ab13970                       | chicken IgG    | 1:2000                  |
| AR                       | ThermoFisher #PA5-16750              | rabbit IgG     | 1:500                   |
| E-cadherin               | BD Transduction Laboratories #610182 | mouse IgG      | 1:200                   |
| SMA                      | Sigma #A5228                         | mouse IgG      | 1:4000                  |
| Vimentin                 | BioLegend #919101                    | chicken IgG    | 1:2000                  |
| CD34                     | Invitrogen #14-0341-82               | rat IgG        | 1:50                    |
| Ki67                     | Cell Signaling #9129                 | rabbit IgG     | 1:500                   |
| T $\square$ RII          | Santa Cruz #sc-220                   | rabbit IgG     | 1:200                   |
| Biotinylated anti-rabbit | Vector Laboratories #BA-1000         | goat IgG       | 1:750                   |
| Biotinylated anti-rabbit | Vector Laboratories #BA-2000         | goat IgG       | 1:750                   |
| Goat anti-rabbit 488     | Invitrogen #A11034                   | goat IgG       | 1:500                   |
| Goat anti-mouse 488      | Invitrogen #A11001                   | goat IgG       | 1:500                   |
| Goat anti-rabbit 594     | Invitrogen #A11012                   | goat IgG       | 1:500                   |
| Goat anti-mouse 594      | Invitrogen #A11005                   | goat IgG       | 1:500                   |
| Goat anti-chicken 647    | Invitrogen #A31571                   | goat IgG       | 1:200                   |
