# Supplementary material for: Loss of androgen signaling in mesenchymal sonic hedgehog responsive cells diminishes prostate development, growth, and regeneration
Source: PubMed Central journal article supplement (PMC6980684; doi:10.1371/journal.pgen.1008588), 2020-01-13
Supplement: pgen.1008588.s012.pdf [file pgen.1008588.s012.pdf]

**Table S7. qRT-PCR primers used in this study.**

| Genes    | Primer name   | Sequences                                  | Amplicon (bp) |
|----------|---------------|--------------------------------------------|---------------|
| AR       | qPCR-AR-F     | 5'- AAA CTT CTT TCG CTG GGG CTT C - 3'     | 90            |
|          | qPCR-AR-R     | 5'- AGA ACA GAA CAC TAG CGC TTG G - 3'     |               |
| Probasin | qPCR-PBSN-F   | 5'- CAC AGT ATG AAG GGA GCA TAG - 3'       | 105           |
|          | qPCR-PBSN-R   | 5'- CCA CTC GTG TGA CAT CAT T - 3'         |               |
| LIF      | qPCR-LIF-F    | 5'- ACG GCA ACC TCA TGA AC - 3'            | 92            |
|          | qPCR-LIF-R    | 5'- CCC TTG AGC TGT GTA ATA GG - 3'        |               |
| LEFTY1   | qPCR-LEFTY1-F | 5'- CAC ACA AGT TGG TTC GTT TC - 3'        | 111           |
|          | qPCR-LEFTY1-R | 5'- TGC CTT GAG CTC CAT AGT - 3'           |               |
| MMP13    | qPCR-MMP13-F  | 5'- GCA GTT CCA AAG GCT ACA A - 3'         | 77            |
|          | qPCR-MMP13-R  | 5'- CTT GGA GTG ATC CAG ACC TA - 3'        |               |
| IL12     | qPCR-IL12-F   | 5'- GTC CAG GCA CAT CAG ACC - 3'           | 100           |
|          | qPCR-IL12-R   | 5'- GAG TGG AGA CAC CAG CCA A - 3'         |               |
| MMP10    | qPCR-MMP10-F  | 5'- GGG TCT CTT TCA TTC CGA CAA G - 3'     | 93            |
|          | qPCR-MMP10-R  | 5'- TCA TCT TGA GAA AGG TGG AAG TTA G - 3' |               |
| NOS3     | qPCR-NOS3-F   | 5'- ATC CTA ACT TGC CCT GCA TC - 3'        | 235           |
|          | qPCR-NOS3-R   | 5'- CAG GTT GTA GCC CTT TGA TCT - 3'       |               |
| CENPE    | qPCR-CENPE-F  | 5'- AGC ATT GGG CTC GTG AAT AA - 3'        | 121           |
|          | qPCR-CENPE-R  | 5'- GTG ACT TCA GGT ACT GAT CCA AG - 3'    |               |
| GNRH1    | qPCR-GNRH1-F  | 5'- TCT ACT GCT GAC TGT GTG TTT G - 3'     | 135           |
|          | qPCR-GNRH1-R  | 5'- GCC ATT TGA TCC ACC TCC TT - 3'        |               |
| SMAD3    | qPCR-SMAD3-F  | 5'- CAC GCA GAA CGT GAA CAC C - 3'         | 101           |
|          | qPCR-SMAD3-R  | 5'- GGC AGT AGA TAA CGT GAG GGA - 3'       |               |
| SMAD4    | qPCR-SMAD4-F  | 5'- ATG TGA CAG TGT CTG TGT GAA - 3'       | 82            |
|          | qPCR-SMAD4-R  | 5'- CTG CAG TGT TAA TCC TGA GAG A - 3'     |               |
| PPIA     | qPCR-PP1A-F   | 5'- TGT GCC AGG GTG GTG ACT TT - 3'        | 144           |
|          | qPCR-PP1A-R   | 5'- CGT TTG TGT TTG GTC CAG CAT - 3'       |               |
